# Supplementary figures and images for: Intratumoral BO-112 in combination with radiotherapy synergizes to achieve CD8 T-cell-mediated local tumor control
Source: HighWire-hosted journal article supplement (doi:10.1136/jitc-2022-005011), 2023-01-01

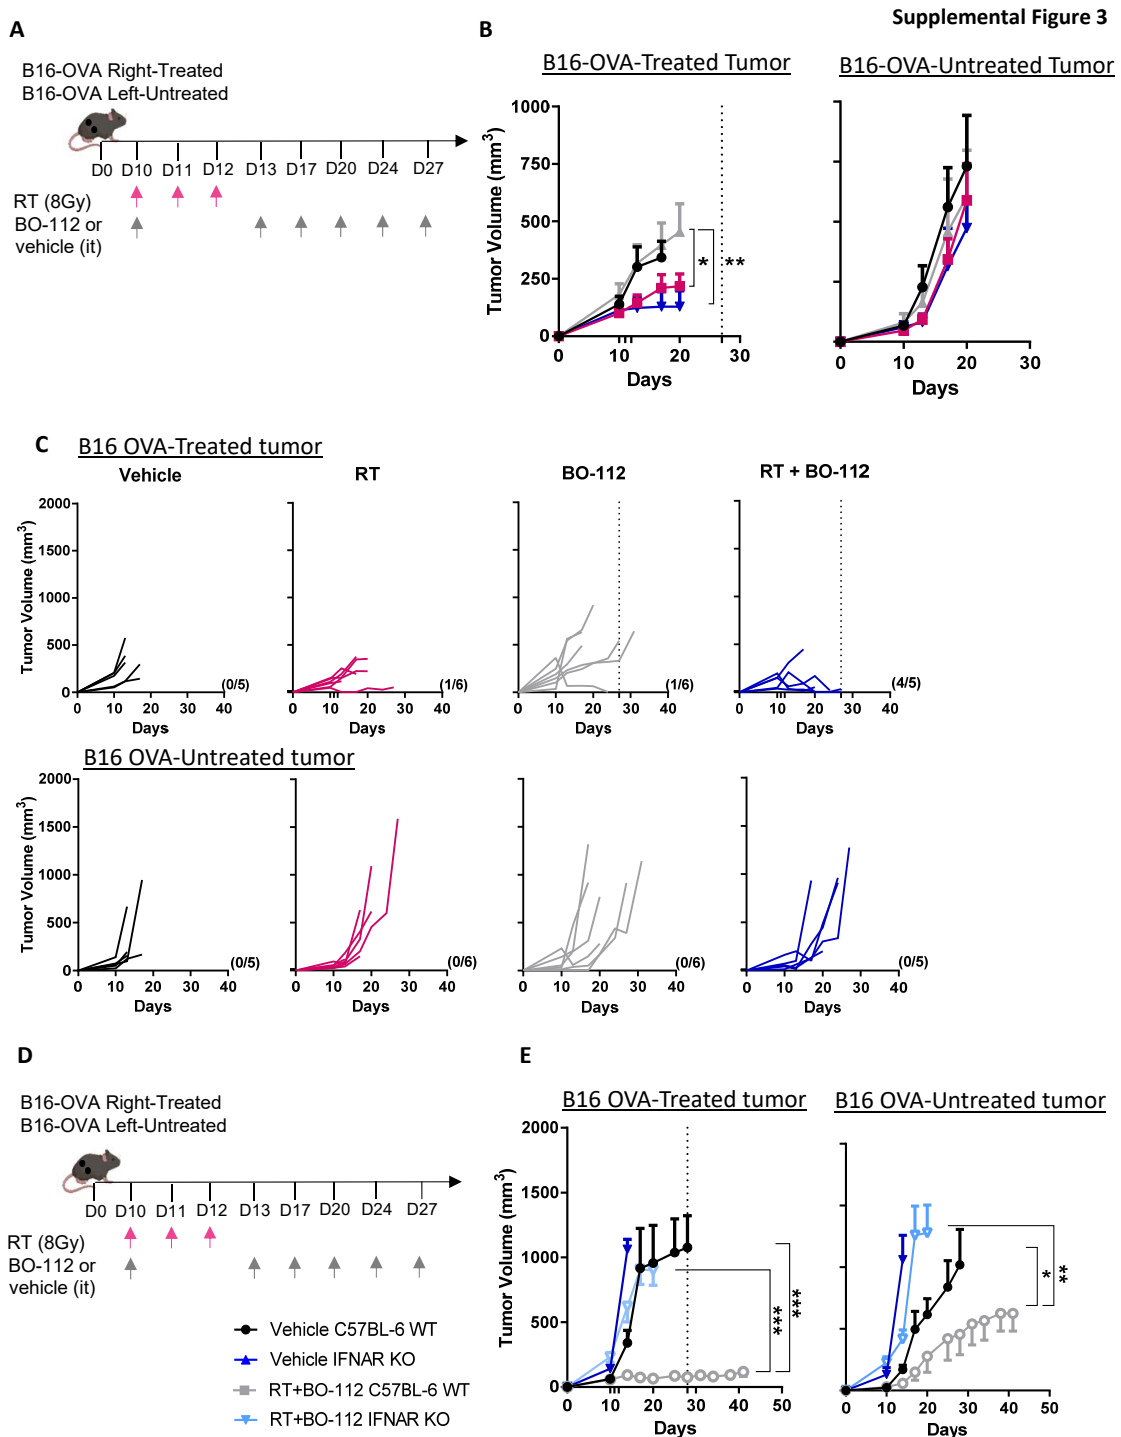

Supplement: jitc-2022-005011supp003_data_supplement.pdf [file jitc-2022-005011supp003_data_supplement.pdf]
